# Supplementary material for: Laning, thinning and thickening of sheared colloids in a two-dimensional Taylor–Couette geometry
Source: Royal Society of Chemistry journal article supplement (doi:10.1039/c8sm00434j), 2018-01-01
Supplement: c8sm00434j1.pdf [file c8sm00434j1.pdf]

## Supporting Information for: Laning, Thinning and Thickening of Sheared Colloids in a Two-dimensional Taylor-Couette Geometry

Antonio Ortiz-Ambriz<sup>1</sup>, Sascha Gerloff<sup>2</sup>, Sabine H. L. Klapp<sup>2</sup>, Jordi Ortín<sup>1,3</sup>, and Pietro Tierno<sup>1,3,4\*</sup>

<sup>1</sup>*Departament de Física de la Matèria Condensada, Universitat de Barcelona, Barcelona, Spain*

<sup>2</sup>*Institut für Theoretische Physik, Technische Universität Berlin, Berlin, Germany*

<sup>3</sup>*Universitat de Barcelona Institute of Complex Systems (UBICS), Universitat de Barcelona, Barcelona, Spain and*

<sup>4</sup>*Institut de Nanociència i Nanotecnologia, Universitat de Barcelona, Barcelona, Spain*

(Dated: March 2, 2018)

### SUPPORTING VIDEOS

The following five videoclips support Figs. 1, 2 and 4.

- **VideoS1**(.WMV) This videoclip illustrates the dynamics of a colloidal cluster subjected to a clockwise rotating magnetic field with amplitude  $B_0 = 1.5\text{mT}$  and frequency  $\Omega = 125.7\text{rads}^{-1}$ . The outer colloidal layer is rotated by the AOD in counter-clockwise direction at an angular velocity of  $\omega_4 = -0.6\text{rads}^{-1}$ . The video corresponds to the situation (b) in Fig.2 of the article.
- **VideoS2**(.WMV) This video shows a colloidal cluster where the inner magnetic trimer is subjected to a counter-clockwise rotating field of amplitude  $B_0 = 0.65\text{mT}$  and frequency  $\Omega = 125.7\text{rads}^{-1}$ , while the outer particles are not rotated ( $\omega_4 = 0\text{rads}^{-1}$ ). The video corresponds to the Fig.1 of the article.
- **VideoS3**(.WMV) This video shows a colloidal cluster where both the inner trimer ( $B_0 = 1.25\text{mT}$ ,  $\Omega = 125.7\text{rads}^{-1}$ ) and the outer layer ( $\omega_4 = 0.4\text{rads}^{-1}$ ) are rotated in clockwise direction. The video corresponds to Fig.1 of the article.
- **VideoS4**(.WMV) This video shows a colloidal cluster where the outer particles are not rotated ( $\omega_4 = 0\text{rads}^{-1}$ ), while the inner trimer is subjected to a counter-clockwise rotating field with  $B_0 = 1.1\text{mT}$  and frequency  $\Omega = 125.7\text{rads}^{-1}$ . The video corresponds to Fig.4 of the article.
- **VideoS5**(.WMV) Videoclip showing a colloidal cluster with the inner trimer subjected to a counter-clockwise rotating field with  $B_0 = 4.2\text{mT}$  and  $\Omega = 125.7\text{rads}^{-1}$ , while the outer particles are not rotated ( $\omega_4 = 0\text{rads}^{-1}$ ). The video corresponds to Fig.4 of the article.

---

\* ptierno@ub.edu
